# Supplementary material for: Nutritional screening is strongly associated with overall survival in patients treated with targeted agents for metastatic renal cell carcinoma
Source: PubMed Central journal article supplement — J Cachexia Sarcopenia Muscle. 2015 Apr 20;6(3):222–30. doi: 10.1002/jcsm.12025 (PMC4575553; doi:10.1002/jcsm.12025), 2015-04-20
Supplement: jcsm0006-0222-sd1.pdf [file jcsm0006-0222-sd1.pdf]

**Summary of common adverse events collected during 30-days from nutritional status evaluation.**

| Category and events   | All grades<br>N (%) | Grade 1/2<br>N (%) | Grade 3/4<br>N (%) |
|-----------------------|---------------------|--------------------|--------------------|
| Fatigue               | 71 (23.7)           | 57 (19.0)          | 14 (4.7)           |
| Nausea                | 52 (17.3)           | 50 (16.7)          | 2 (0.06)           |
| Vomiting              | 18 (6.0)            | 16 (5.3)           | 2 (0.7)            |
| Diarrhea              | 65 (21.7)           | 60 (20.0)          | 5 (1.7)            |
| Hypertension          | 65 (21.7)           | 53 (17.6)          | 12 (4.0)           |
| Skin discoloration    | 9 (3.0)             | 9 (3.0)            | 0 (0.0)            |
| Changes in hair color | 11 (3.7)            | 11 (3.7)           | 0 (0.0)            |
| Hand-foot syndrome    | 110 (36.7)          | 89 (29.7)          | 21 (7.0)           |
| Mucosal inflammation  | 31 (10.3)           | 27 (9.0)           | 4 (1.3)            |
| Rash                  | 41 (13.7)           | 38 (12.7)          | 3 (1.0)            |
| Leukopenia            | 76 (25.3)           | 71 (23.7)          | 5 (1.7)            |
| Neutropenia           | 82 (27.3)           | 73 (24.3)          | 9 (3.0)            |
| Thrombocytopenia      | 75 (25.0)           | 48 (16.0)          | 27 (9.0)           |
| Anemia                | 48 (16.0)           | 47 (15.7)          | 1 (0.3)            |
| Increased creatinine  | 16 (5.3)            | 15 (4.7)           | 1 (0.6)            |
| Albuminuria           | 21 (7.0)            | 17 (4.3)           | 4 (2.7)            |
| Liver dysfunction     | 43 (14.3)           | 34 (11.3)          | 9 (3.0)            |
| Weight loss           | 25 (8.3)            | 24 (8.0)           | 1 (0.3)            |
