# Supplementary material for: Nutritional screening is strongly associated with overall survival in patients treated with targeted agents for metastatic renal cell carcinoma
Source: PubMed Central journal article supplement — J Cachexia Sarcopenia Muscle. 2015 Apr 20;6(3):222–30. doi: 10.1002/jcsm.12025 (PMC4575553; doi:10.1002/jcsm.12025), 2015-04-20
Supplement: jcsm0006-0222-sd2.pdf [file jcsm0006-0222-sd2.pdf]

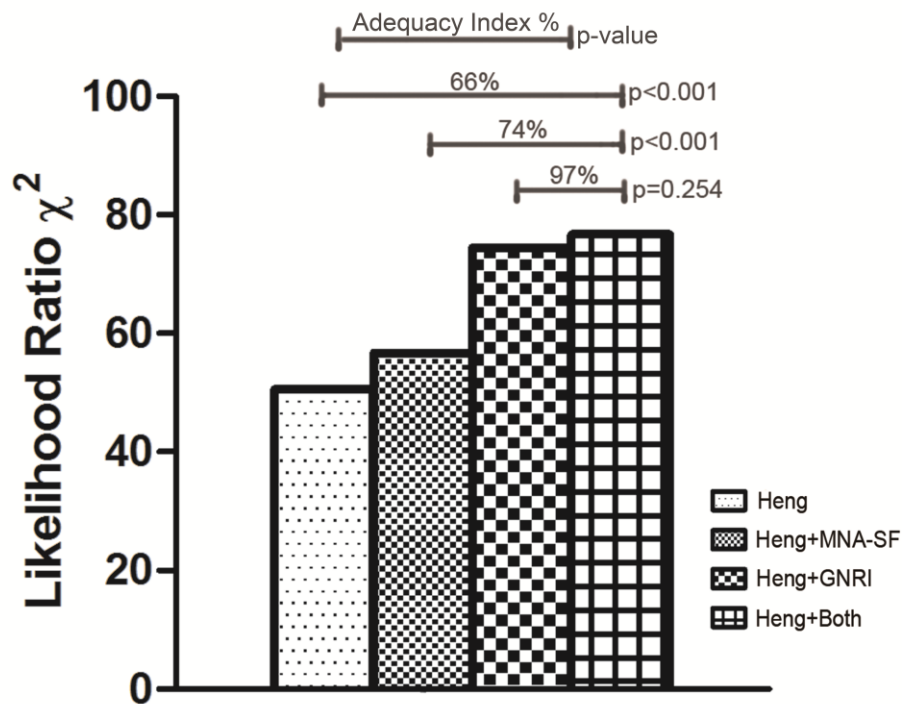

Cox regression models showing the predictive performance of the Heng score combined with GNRI and/or MNA-SF scores. The predictive performance is represented by the model's likelihood ratio  $\chi^2$  and adequacy index (% likelihood ratio  $\chi^2$  attributable to the nested model). *P* values shown are of an LR  $\chi^2$  test for nested models.

**Annotation:** The maximum predictive performance was achieved by combining all scores. Each model was then compared with the maximum model. A model with a higher adequacy index provided better performance. Statistical comparisons were performed using the likelihood test, which was more sensitive.
